# Supplementary material for: Catalytic properties and deactivation behavior of H-MCM-22 in the conversion of methanol to hydrocarbons
Source: Royal Society of Chemistry journal article supplement (doi:10.1039/c5ra00048c), 2015-01-01
Supplement: c5ra00048c1.pdf [file c5ra00048c1.pdf]

## Supplementary Information

### **Catalytic properties and deactivation behavior of H-MCM-22 in the conversion of methanol to hydrocarbons**

Pengfei Wang <sup>a,b</sup>, Lizhi Huang <sup>a</sup>, Junfen Li <sup>a</sup>, Mei Dong <sup>a</sup>, Jianguo Wang <sup>a</sup>, Takashi Tatsumi<sup>c</sup>, Weibin Fan <sup>a,\*</sup>

<sup>a</sup> *State Key Laboratory of Coal Conversion, Institute of Coal Chemistry, Chinese Academy of Sciences, Taiyuan 030001, China*

<sup>b</sup> *University of Chinese Academy of Sciences, Beijing 100049, China*

<sup>c</sup> *Chemical Resources Laboratory, Tokyo Institute of Technology, Nagatsuta 4259, Midori-ku, Yokohama 226-8503, Japan*

\*To whom correspondence should be addressed

Tel: +86-351-4199009

Fax: +86-351-4041153

E-mail: fanwb@sxicc.ac.cn

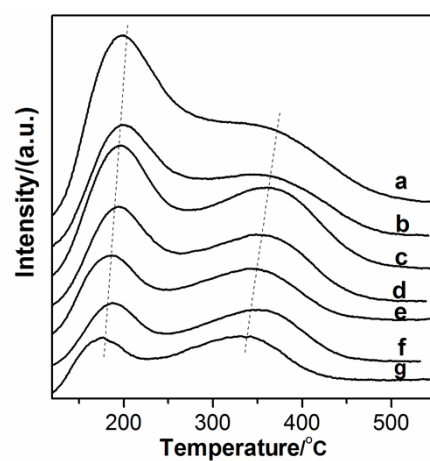

**Fig. S1** NH<sub>3</sub>-TPD profiles of the parent and oxalic acid-treated H-MCM-22 samples; (a) H-MCM-22-15, (b) H-MCM-22-15-o, (c) H-MCM-22-25, (d) H-MCM-22-25-o, (e) H-MCM-22-37, (f) H-MCM-22-37-o and (g) H-MCM-22-50.

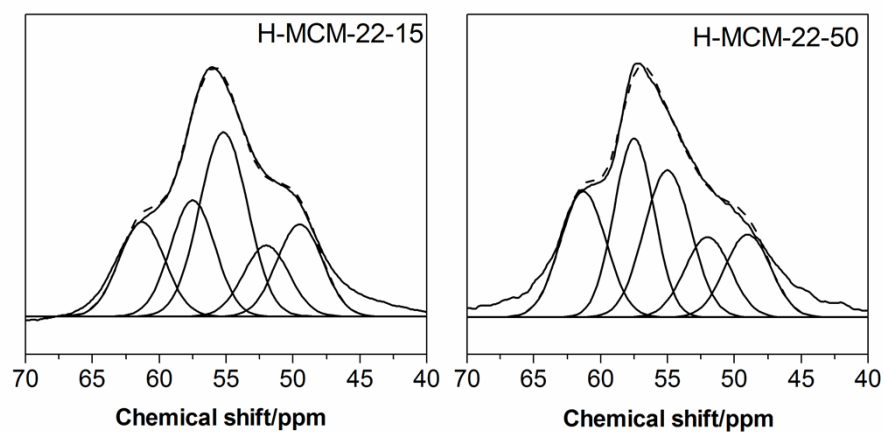

**Fig. S2** Deconvolved  $^{27}\text{Al}$  MAS NMR spectra of H-MCM-22-15 and H-MCM-22-50 (the dash line is the simulated spectra).

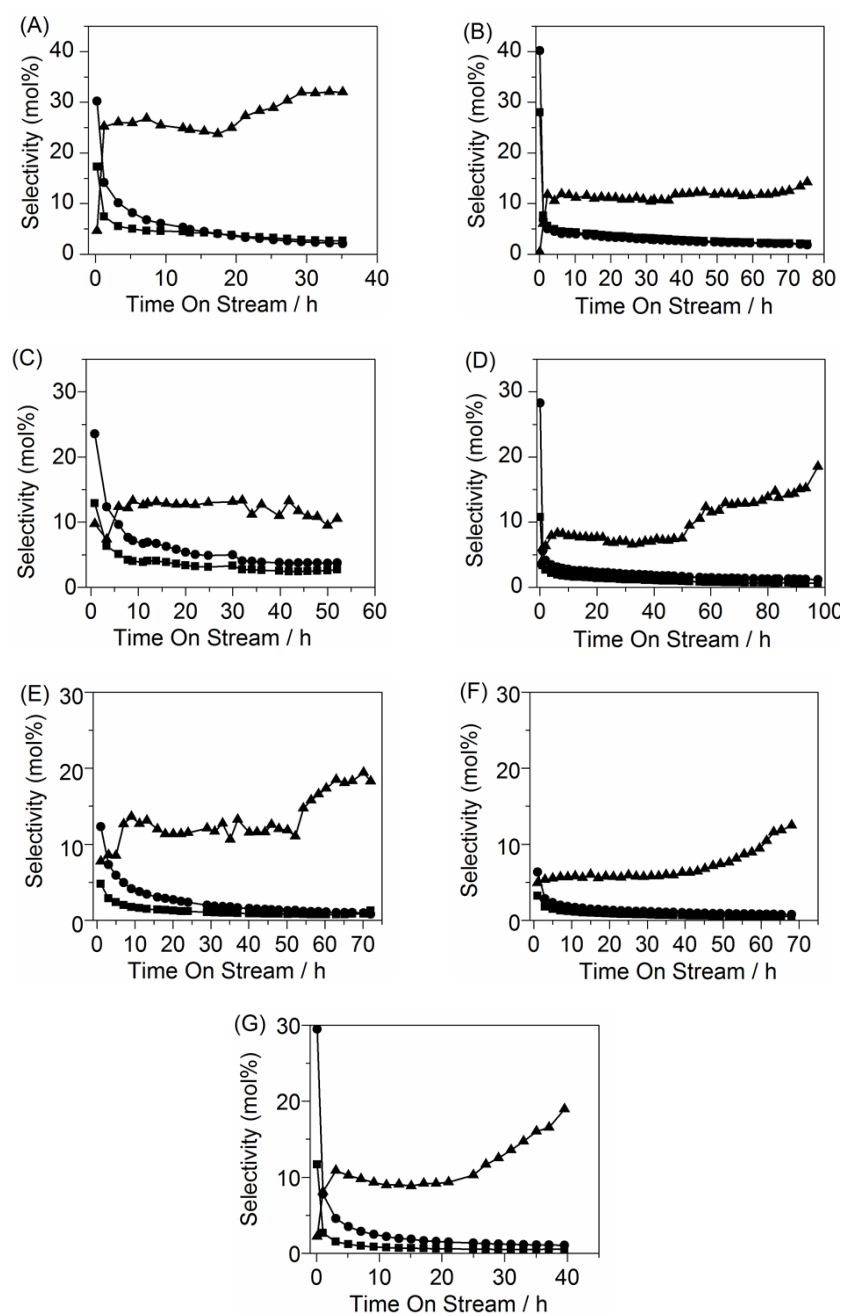

**Fig. S3** Product selectivity obtained over the parent and the oxalic acid-treated H-MCM-22 samples (Reaction conditions: 450 °C, WHSV of 2 h<sup>-1</sup>); (A) H-MCM-22-15; (B) H-MCM-22-15-o; (C) H-MCM-22-25; (D) H-MCM-22-25-o; (E) H-MCM-22-37; (F) H-MCM-22-37-o; (G) H-MCM-22-50; (■) ethane and propane, (●) butane, (▲) C6+ (aliphatic and aromatics hydrocarbons).

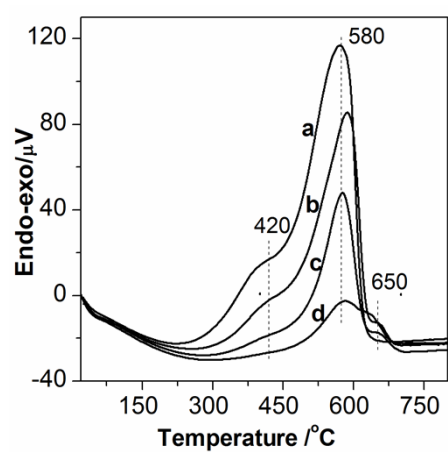

**Fig. S4** DTA profiles of the coked (a) H-MCM-22-15, (b) H-MCM-25-22, (c) H-MCM-22-37 and (d) H-MCM-22-50.

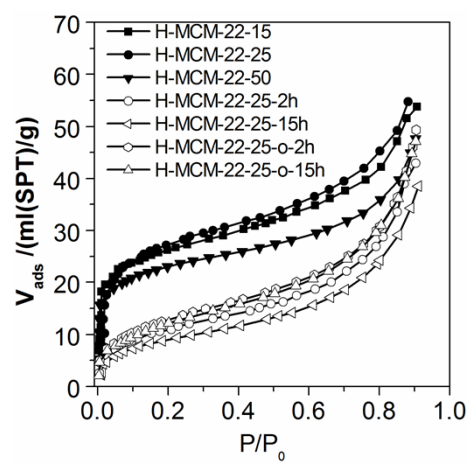

**Fig. S5** *p*-Xylene adsorption isotherms at 25 °C on the fresh and coked H-MCM-22-*x* and H-MCM-22-*x*-*o*.

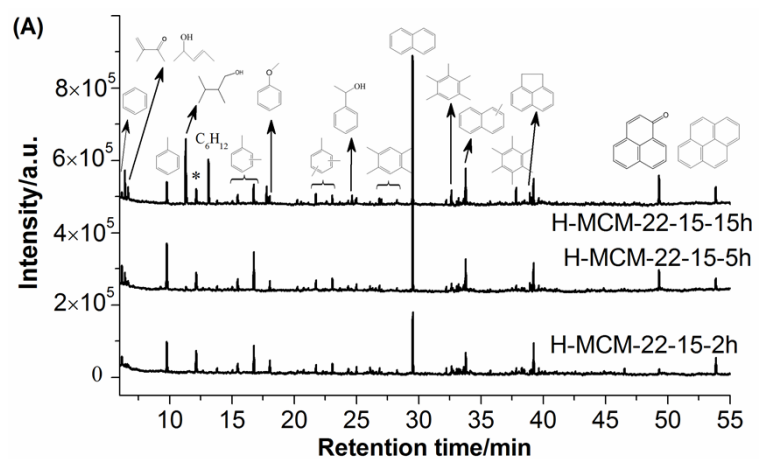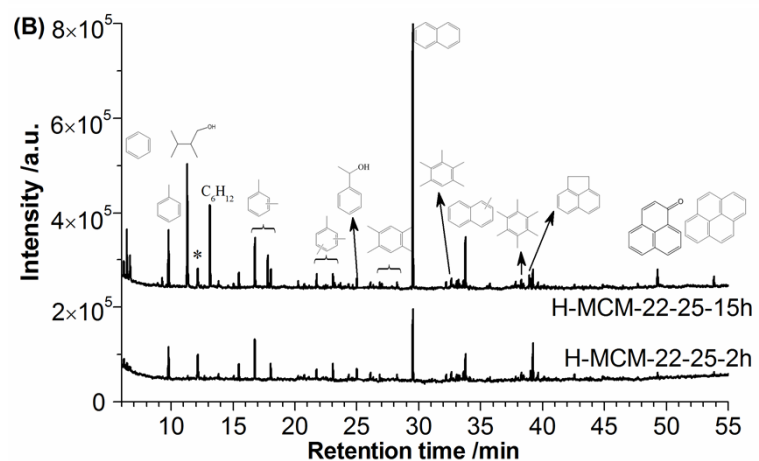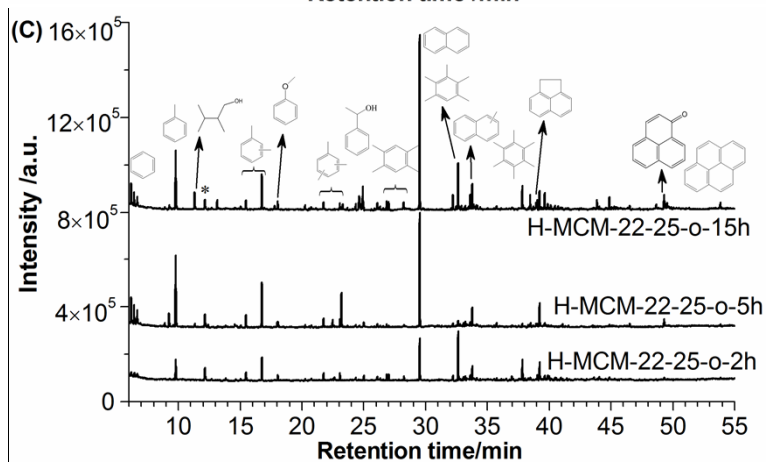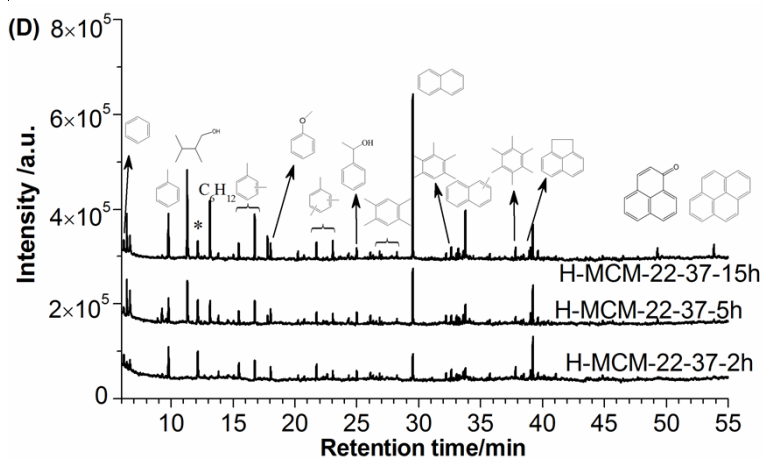

**Fig. S6** GC-MS chromatogram of the coke species extracted with  $\text{CH}_2\text{Cl}_2$  from (A) H-MCM-22-15, (B) H-MCM-22-25, (C) H-MCM-22-25-o and (D) H-MCM-22-37 at different reaction time (Reaction conditions: 450 °C, WHSV = 2 h<sup>-1</sup>. The asterisk (\*) represents the internal standard ( $\text{C}_2\text{Cl}_4$ )).

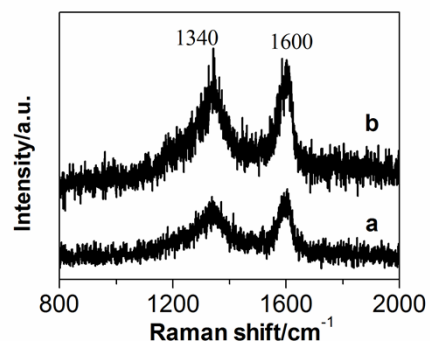

**Fig. S7** Raman spectra of the coke species deposited on the (a) H-MCM-22-25 and (b) H-MCM-22-37.

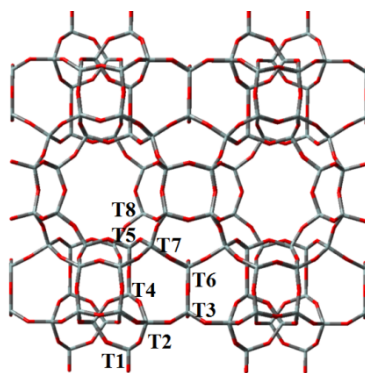

**Scheme S1** MCM-22 framework with 8 crystallographically inequivalent T sites.
